# Supplementary material for: Safety, Tolerability, and Effect of Nusinersen Treatment in Ambulatory Adults With 5q-SMA
Source: Frontiers journal article supplement (doi:10.3389/fneur.2021.650535), 2021-05-20

**Supplemental Figure 1:** Longitudinal Plots of Participants studied 10 years prior to baseline.

A. Maximum Voluntary Isometric Contraction Testing (MVICT) Sum Score

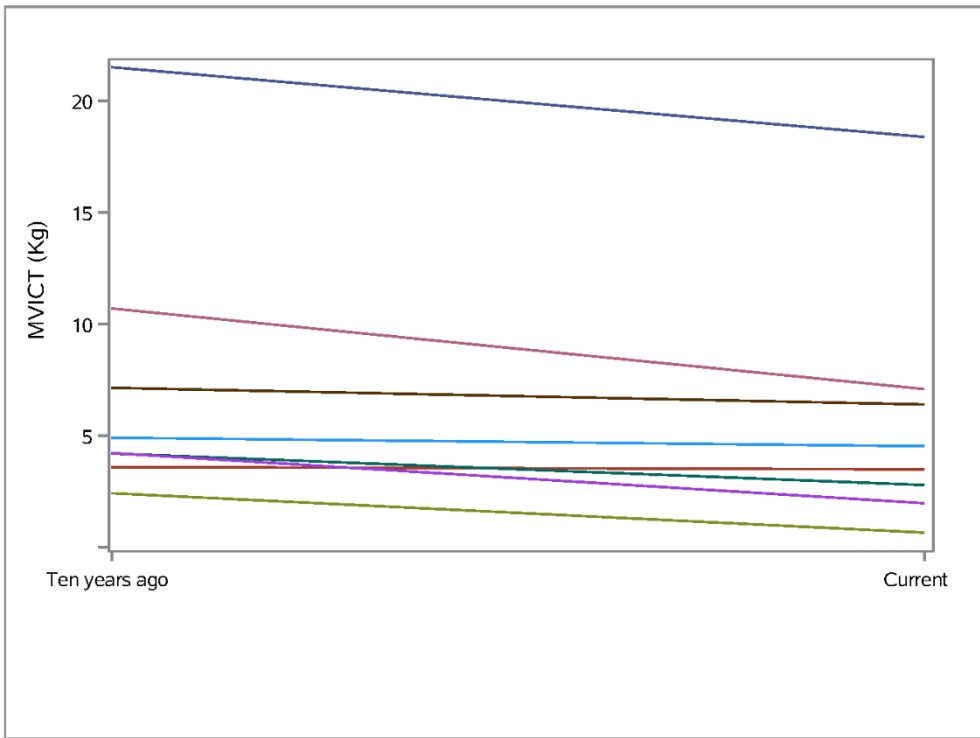

B. Spinal muscular atrophy functional rating scale (SMA-FRS)

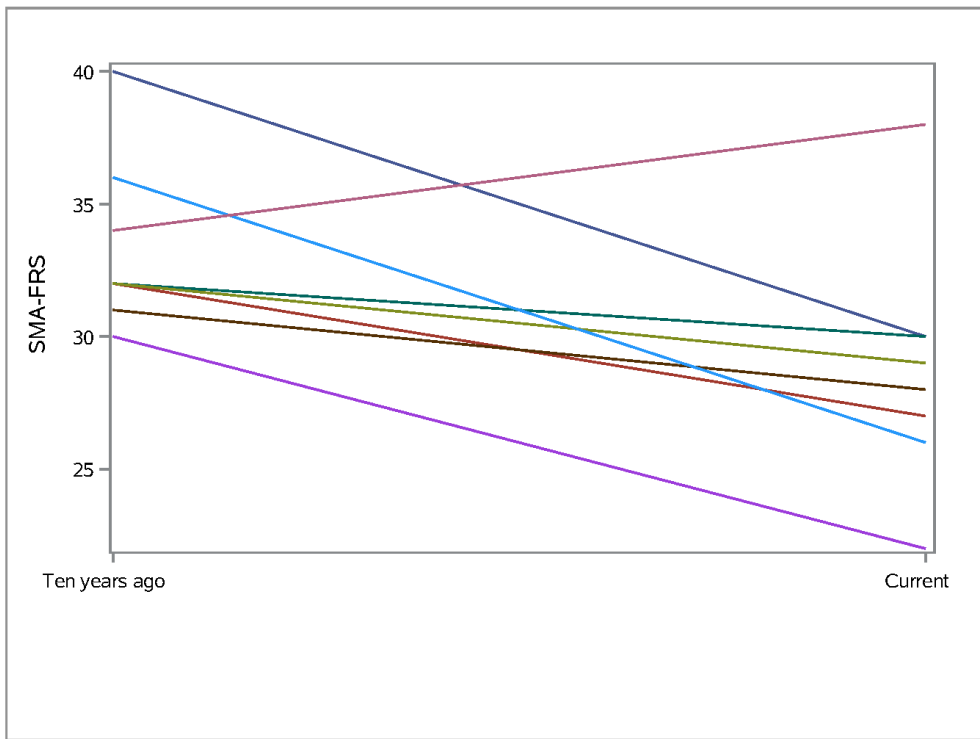

C. Six minute walk test (6MWT) Distance (meters)

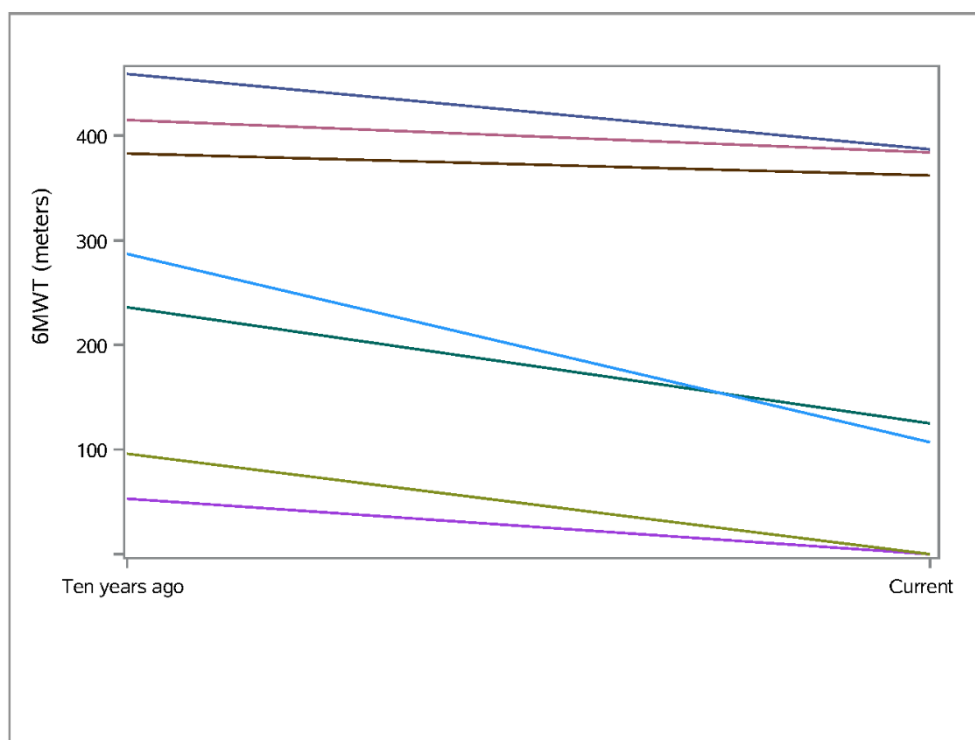

D. Forced vital capacity (FVC) (liters)

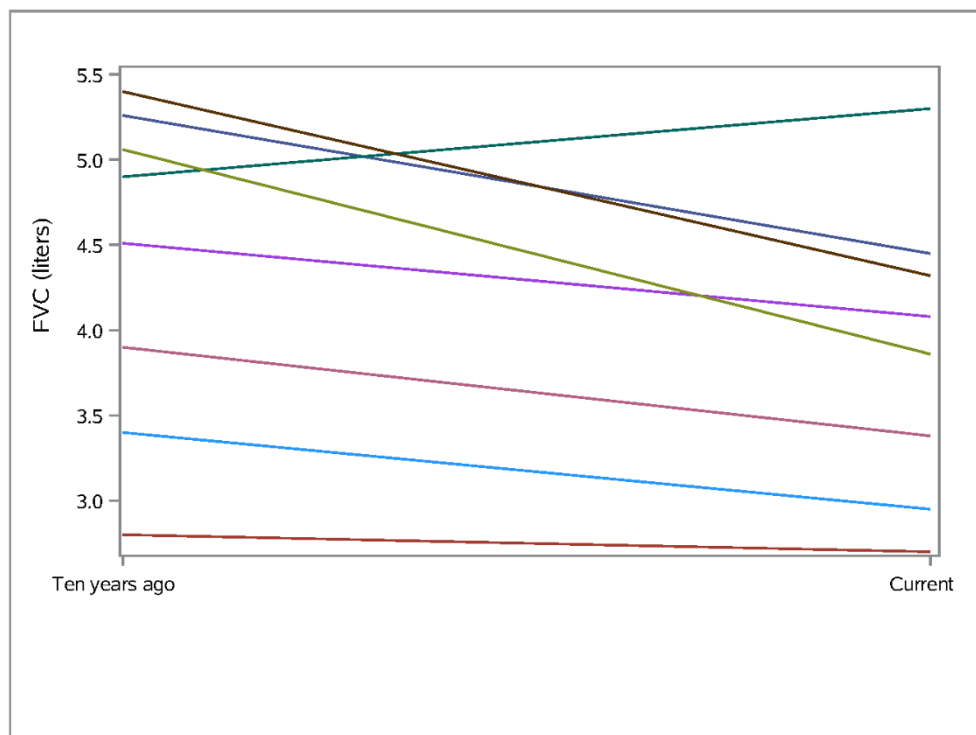

# E. Compound muscle action potential (CMAP) Amplitude

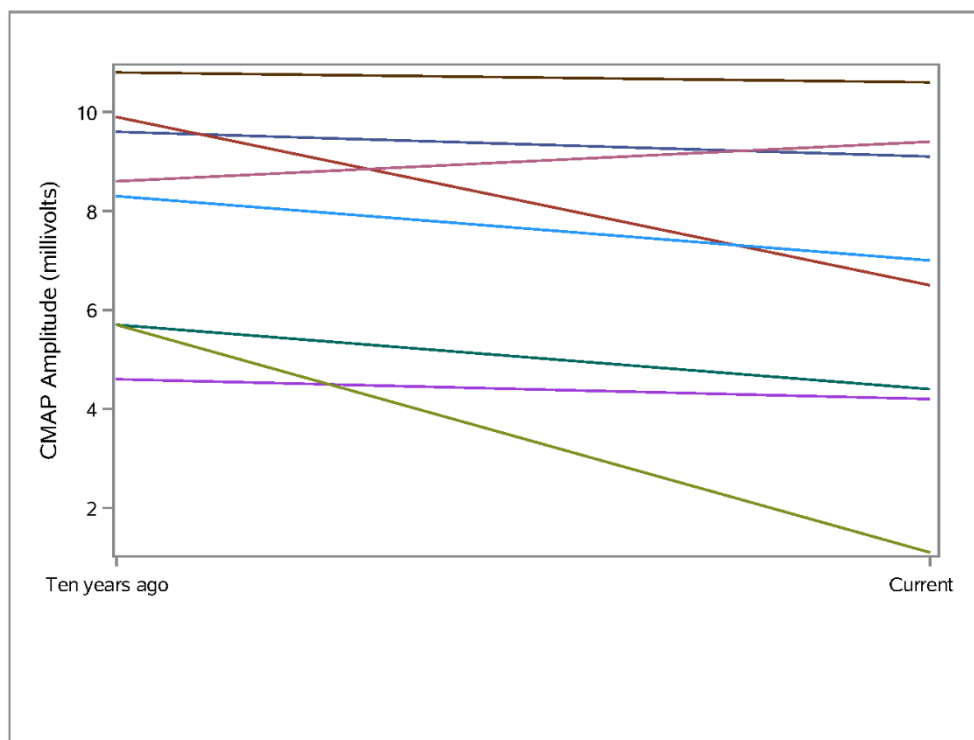

Supplement: Image_1.PDF [file Image_1.PDF]
